# Supplementary material
Source: publisher site journal article supplement (https://www.dovepress.com/article/314861)
Supplement: Supplementary file 1 [file get_supplementary_file.php]

## **Supporting information**

S1 table: Summary of candidate genes in the study associated with leprosy

S2 table: Ethnicity distribution of the study groups

S3 table: Analysis of association between SNPs and leprosy<sup>a</sup>

S4 table: Genotypic distributions of the study groups

S5 table: Analysis of association between SNPs and leprosy onset early cases

S6 table: Analysis of association between SNPs and leprosy WHO classifications

S7 table: Analysis of association between SNPs and leprosy subtypes

S8 table: Analysis of association between SNPs and reversal reaction in BB, BT and

BL leprosy cases

S9 table: Analysis of association between SNPs and erythema nodosum leprosum in LL

and BL leprosy cases

S10 table: Analysis of association between SNPs and leprosy reaction states

Supplementary Table 1. Summary of candidate genes in the study associated with leprosy

| SNP         | Gene                  | Functional Consequence | MAF <sup>a</sup> | Molecular function for genes                                                                                                                             |
|-------------|-----------------------|------------------------|------------------|----------------------------------------------------------------------------------------------------------------------------------------------------------|
| rs76418789  | <i>IL23R</i>          | missense               | 0.011            | IL23R was critical for optimal levels of pattern-recognition receptor-induced signaling and cytokines in human monocyte-derived macrophages <sup>1</sup> |
| rs146466242 | <i>FLG</i>            | stop gained            | 0.004            | Encoded filaggrin, filaggrin plays a crucial role in the barrier function of epidermis <sup>2</sup>                                                      |
| rs2221593   | <i>BATF3</i>          | upstream               | 0.161            | Plays a central role in the development of conventional dendritic cells, which in turn are critical for optimal priming of CD8+ T cells <sup>3</sup>     |
| rs2058660   | <i>IL18RAP/IL18RI</i> | intron                 | 0.694            | Plays an important role in IFN- $\gamma$ production <sup>4</sup>                                                                                         |
| rs73058713  | <i>CDH18</i>          | intron                 | 0.178            | Involves in neuronal development and govern metabolic processes in later life <sup>[5]</sup>                                                             |

|            |                           |                           |       |                                                                                                                                  |
|------------|---------------------------|---------------------------|-------|----------------------------------------------------------------------------------------------------------------------------------|
| rs2275606  | <i>RAB32</i>              | ncRNA<br>intronic         | 0.134 | Key regulator of a host defense pathway that can restrict intracellular bacterial pathogens <sup>6</sup>                         |
| rs4720118  | <i>BBS9</i>               | intron                    | 0.672 | Involves in parathyroid hormone action in bones <sup>7</sup>                                                                     |
| rs55894533 | <i>CTSB</i>               | intergenic                | 0.409 | Associated with the migration ability of keratinocytes and unobstructed migration of keratinocytes <sup>7</sup>                  |
| rs6478108  | <i>TNFSF15</i>            | intron                    | 0.715 | Involved in mediating the switch from Th1 cells to Th2 cells <sup>8</sup>                                                        |
| rs10817758 | <i>I-Dec</i>              | intron                    | 0.182 | Acts as an accelerator in tumor progression <sup>[9]</sup>                                                                       |
| rs780668   | <i>SLC29A3</i>            | missense                  | 0.480 | Encodes ENT3, a key role in maintaining T cell homeostasis by supporting the proliferation and survival of T cells <sup>10</sup> |
| rs663743   | <i>CCDC88</i><br><i>B</i> | 5 prime<br>UTR<br>variant | 0.198 | A key role for mobility and inflammatory functions of dendritic cells <sup>11</sup>                                              |
| rs3764147  | <i>LACCI</i>              | missense                  | 0.306 | Associated with autoimmunity and granulomatous disease diseases <sup>12</sup>                                                    |

|             |                |          |         |                                                                                                                        |
|-------------|----------------|----------|---------|------------------------------------------------------------------------------------------------------------------------|
| rs142179458 | <i>HIF1A</i>   | missense | 0.005   | Plays a role in immune reactions and chaperone-mediated autophagy <sup>13</sup>                                        |
| rs9302752   | <i>NOD2</i>    | upstream | 0.500   | pro-inflammatory <sup>14</sup>                                                                                         |
| rs149308743 | <i>CARD9</i>   | missense | <0.001  | The adaptor CARD9 functions downstream of C-type lectin receptors for the sensing of microbial infection <sup>15</sup> |
| rs145562243 | <i>NCKIPSD</i> | missense | <0.0001 | involved in the Rho signaling pathway <sup>16</sup>                                                                    |

---

<sup>a</sup> Minor allele frequency (MAF) from the 1000 Genomes Project<sup>17</sup>, variants with MAF <0.05 were regarded as rare.

## References

- 1 Sun R, Hedl M, Abraham C. IL23 induces IL23R recycling and amplifies innate receptor-induced signalling and cytokines in human macrophages, and the IBD-protective IL23R R381Q variant modulates these outcomes. *Gut* 2020; 69(2): 264-73.
- 2 Shi W, Mi Z, Wang Z, et al. Massively Parallel Sequencing of the Filaggrin Gene Reveals an Association Between FLG Loss-of-function Mutations and Leprosy. *Acta Derm Venereol* 2020; 100(17): v299.
- 3 Ataide MA, Komander K, Knöpper K, et al. BATF3 programs CD8(+) T cell memory. *Nat Immunol* 2020; 21(11): 1397-407.

- 4 Liu H, Irwanto A, Tian H, et al. Identification of IL18RAP/IL18R1 and IL12B as leprosy risk genes demonstrates shared pathogenesis between inflammation and infectious diseases. *Am J Hum Genet* 2012; 91(5): 935-41.
- 5 Schlicht K, Nyczka P, Caliebe A, et al. The metabolic network coherence of human transcriptomes is associated with genetic variation at the cadherin 18 locus. *Hum Genet* 2019; 138(4): 375-88.
- 6 Solano-Collado V, Rofe A, Spanò S. Rab32 restriction of intracellular bacterial pathogens. *Small GTPases* 2018; 9(3): 216-23.
- 7 Wang Z, Sun Y, Fu X, et al. A large-scale genome-wide association and meta-analysis identified four novel susceptibility loci for leprosy. *Nat Commun* 2016; 7(13760).
- 8 Kadiyska T, Tourtourikov I, Popmihaylova AM, Kadian H, Chavoushian A. Role of TNFSF15 in the intestinal inflammatory response. *World J Gastrointest Pathophysiol* 2018; 9(4): 73-78.
- 9 Sato F, Bhawal UK, Yoshimura T, Muragaki Y. DEC1 and DEC2 Crosstalk between Circadian Rhythm and Tumor Progression. *J Cancer* 2016; 7(2): 153-59.
- 10 Wei CW, Lee CY, Lee DJ, et al. Equilibrative Nucleoside Transporter 3 Regulates T Cell Homeostasis by Coordinating Lysosomal Function with Nucleoside Availability. *Cell Rep* 2018; 23(8): 2330-41.
- 11 Olivier JF, Fodil N, Al HS, et al. CCDC88B is required for mobility and inflammatory functions of dendritic cells. *J Leukoc Biol* 2020; 108(6): 1787-802.
- 12 Jostins L, Ripke S, Weersma RK, et al. Host-microbe interactions have shaped the

- genetic architecture of inflammatory bowel disease. *Nature* 2012; 491(7422): 119-24.
- 13 Ferreira JV, Fôfo H, Bejarano E, et al. STUB1/CHIP is required for HIF1A degradation by chaperone-mediated autophagy. *Autophagy* 2013; 9(9): 1349-66.
  - 14 Sales-Marques C, Cardoso CC, Alvarado-Arnez LE, et al. Genetic polymorphisms of the IL6 and NOD2 genes are risk factors for inflammatory reactions in leprosy. *PLoS Negl Trop Dis* 2017; 11(7): e5754.
  - 15 Xu X, Xu JF, Zheng G, et al. CARD9(S12N) facilitates the production of IL-5 by alveolar macrophages for the induction of type 2 immune responses. *Nat Immunol* 2018; 19(6): 547-60.
  - 16 Lew ZX, Zhou HM, Fang YY, et al. Transgelin interacts with PARP1 in human colon cancer cells. *Cancer Cell Int* 2020; 20(366).
  - 17 Abecasis GR, Altshuler D, Auton A, et al. A map of human genome variation from population-scale sequencing. *Nature* 2010; 467(7319): 1061-73.

Supplementary table 2: Ethnicity distribution of the study groups

| Ethnicity | Leprosy<br>(n=1344) | Heredit-<br>related<br>Contacts<br>(n=1908) | First-degree<br>family<br>members<br>(n=1560) | Non-heredit-<br>related<br>Contacts<br>(n=824) |
|-----------|---------------------|---------------------------------------------|-----------------------------------------------|------------------------------------------------|
| Han       | 711(52.9)           | 1106(58.0)                                  | 872(55.9)                                     | 453(55.0)                                      |
| Miao      | 169(12.6)           | 229(12.0)                                   | 197(12.6)                                     | 106(12.9)                                      |
| Yi        | 144(10.7)           | 169(8.9)                                    | 141(9.0)                                      | 82(10.0)                                       |
| Buyi      | 83(6.2)             | 52(2.7)                                     | 52(3.3)                                       | 26(3.2)                                        |
| Tujia     | 35(2.6)             | 64(3.4)                                     | 42(2.7)                                       | 25(3.0)                                        |
| Zhuang    | 34(2.5)             | 73(3.8)                                     | 61(3.9)                                       | 28(3.4)                                        |
| Dai       | 39(2.9)             | 60(3.1)                                     | 54(3.5)                                       | 36(4.4)                                        |
| Others    | 129(9.6)            | 155(8.1)                                    | 141(9.0)                                      | 68(8.3)                                        |

**Supplementary table 3: Analysis of association between SNPs and leprosy<sup>a</sup>**

| SNP         | Gene                  | Minor allele | F_A  | F_U <sup>b</sup> | F_U <sup>c</sup> | F_U <sup>d</sup> | F_U <sup>e</sup> | OR (95% CI) <sup>b</sup> | P <sup>b</sup>         | OR (95% CI) <sup>c</sup> | P <sup>c</sup> | OR (95% CI) <sup>d</sup> | P <sup>d</sup> | OR (95% CI) <sup>e</sup> | P <sup>e</sup> |
|-------------|-----------------------|--------------|------|------------------|------------------|------------------|------------------|--------------------------|------------------------|--------------------------|----------------|--------------------------|----------------|--------------------------|----------------|
| rs2275606   | <i>RAB32</i>          | A            | 0.29 | 0.28             | 0.28             | 0.28             | 0.27             | 1.08(0.98<br>-1.20)      | 0.12                   | 1.07 (0.96- 1.19)        | 0.24           | 1.05 (0.94- 1.18)        | 0.37           | 1.12 (0.98-1.29)         | 0.10           |
| rs142179458 | <i>HIF1A</i>          | A            | 0.05 | 0.05             | 0.05             | 0.05             | 0.05             | 1.02(0.82<br>-1.26)      | 0.88                   | 1.00 (0.80- 1.26)        | 0.98           | 0.97 (0.77- 1.24)        | 0.82           | 1.05 (0.79-1.41)         | 0.74           |
| rs3764147   | <i>LACCI</i>          | G            | 0.41 | 0.34             | 0.36             | 0.37             | 0.30             | 1.362(1.24<br>-1.50)     | 1.62×10 <sup>-10</sup> | 1.26(1.14- 1.40)         | <0.0001        | 1.22(1.10- 1.36)         | 0.0002         | 1.26 (1.14-1.40)         | <0.0001        |
| rs55894533  | <i>CTSB</i>           | C            | 0.47 | 0.45             | 0.45             | 0.45             | 0.45             | 1.08(0.99<br>-1.19)      | 0.09                   | 1.08 (0.98- 1.19)        | 0.13           | 1.08 (0.97- 1.20)        | 0.16           | 1.10 (0.97-1.24)         | 0.16           |
| rs6478108   | <i>TNFSF15</i>        | T            | 0.40 | 0.43             | 0.43             | 0.42             | 0.44             | 0.89(0.81<br>-0.97)      | 0.01                   | 0.90 (0.81- 0.99)        | 0.03           | 0.92 (0.83- 1.03)        | 0.13           | 0.87 (0.76-0.98)         | 0.02           |
| rs73058713  | <i>CDH18</i>          | A            | 0.14 | 0.13             | 0.13             | 0.13             | 0.13             | 1.06(0.93<br>-1.22)      | 0.36                   | 1.06 (0.92-1.22)         | 0.44           | 1.09 (0.94-1.27)         | 0.24           | 1.08 (0.90-1.29)         | 0.40           |
| rs780668    | <i>SLC29A3</i>        | A            | 0.50 | 0.45             | 0.46             | 0.46             | 0.44             | 1.20(1.10<br>-1.32)      | 9.48×10 <sup>-5</sup>  | 1.17 (1.06-1.29)         | 0.002          | 1.15(1.04-1.28)          | 0.007          | 1.28 (1.13-1.45)         | <0.0001        |
| rs10817758  | <i>DECI</i>           | T            | 0.44 | 0.46             | 0.46             | 0.46             | 0.45             | 0.94 (0.86<br>-1.04)     | 0.22                   | 0.93 (0.84-1.02)         | 0.13           | 0.92 (0.83-1.02)         | 0.11           | 0.98 (0.87-1.11)         | 0.79           |
| rs146466242 | <i>FLG</i>            | A            | 0.02 | 0.02             | 0.02             | 0.02             | 0.02             | 1.00(0.71<br>-1.40)      | 0.98                   | 1.00 (0.69-1.44)         | 1.00           | 0.97 (0.66-1.41)         | 0.86           | 0.99 (0.63-1.55)         | 0.96           |
| rs9302752   | <i>NOD2</i>           | C            | 0.27 | 0.24             | 0.25             | 0.25             | 0.22             | 1.18(1.06<br>-1.31)      | 0.002                  | 1.11 (0.99-1.24)         | 0.07           | 1.12 (1.00-1.26)         | 0.06           | 1.35 (1.17-1.56)         | <0.0001        |
| rs2058660   | <i>IL18RAP/IL18R1</i> | C            | 0.42 | 0.43             | 0.42             | 0.42             | 0.43             | 0.96 (0.88<br>-1.06)     | 0.45                   | 0.98 (0.89-1.08)         | 0.69           | 1.00 (0.90-1.11)         | 1.00           | 0.93 (0.82-1.05)         | 0.25           |

|            |                |   |      |      |      |      |      |                     |      |                  |      |                  |      |                  |      |
|------------|----------------|---|------|------|------|------|------|---------------------|------|------------------|------|------------------|------|------------------|------|
| rs4720118  | <i>BBS9</i>    | T | 0.30 | 0.29 | 0.29 | 0.29 | 0.30 | 1.06(0.96<br>-1.17) | 0.27 | 1.07 (0.96-1.19) | 0.23 | 1.09 (0.97-1.22) | 0.14 | 1.04 (0.91-1.18) | 0.61 |
| rs663743   | <i>CCDC88B</i> | A | 0.23 | 0.21 | 0.21 | 0.22 | 0.21 | 1.13(1.01<br>-1.26) | 0.03 | 1.12 (0.99-1.26) | 0.06 | 1.10 (0.97-1.24) | 0.14 | 1.15 (0.99-1.34) | 0.06 |
| rs76418789 | <i>IL23R</i>   | A | 0.05 | 0.04 | 0.04 | 0.04 | 0.03 | 1.14(0.91<br>-1.44) | 0.24 | 1.07 (0.84-1.36) | 0.57 | 1.04 (0.81-1.34) | 0.74 | 1.35 (0.98-1.87) | 0.07 |

---

Abbreviations: SNP, single nucleotide polymorphism; F\_A, minor allele frequency in patients; F\_U, minor allele frequency in control subjects; OR, odds ratio with respect to the minor allele; CI, confidence interval.

<sup>a</sup> Association tested with  $\chi^2$  test or Fisher test.

<sup>b</sup> All HHCs as control subjects.

<sup>c</sup> Heredity-related Contacts as control subjects.

<sup>d</sup> First - degree family members as control subjects.

<sup>e</sup> non-Heredity-related Contacts as control subjects.

**Supplementary table 4: Genotypic distributions of the study groups**

| SNP             | Gene                       | Mino<br>r<br>allele | aa/Aa/AA <sup>a</sup> | Cases<br>(n=1344) | Controls <sup>b</sup><br>(n=2732) | Controls <sup>c</sup><br>(n=1908) | Controls <sup>d</sup><br>(n=1560) | Controls <sup>e</sup><br>(n=824) |
|-----------------|----------------------------|---------------------|-----------------------|-------------------|-----------------------------------|-----------------------------------|-----------------------------------|----------------------------------|
| rs2275606       | <i>RAB32</i>               | A                   | 121/545/6<br>78       | 206/1098/<br>1428 | 150/766/<br>992                   | 127/626/8<br>07                   | 56/332/43<br>6                    |                                  |
| rs1421794<br>58 | <i>HIF1A</i>               | A                   | 4/122/121<br>8        | 10/240/24<br>82   | 8/168/17<br>32                    | 7/141/141<br>2                    | 2/72/750                          |                                  |
| rs3764147       | <i>LACC1</i>               | G                   | 225/665/4<br>54       | 315/1240/<br>1177 | 249/875/<br>784                   | 208/730/6<br>22                   | 66/365/39<br>3                    |                                  |
| rs5589453<br>3  | <i>CTSB</i>                | C                   | 300/663/3<br>81       | 542/1374/<br>816  | 382/956/<br>570                   | 313/782/4<br>65                   | 160/418/2<br>46                   |                                  |
| rs6478108       | <i>TNFSF15</i>             | T                   | 238/609/4<br>97       | 527/1311/<br>894  | 367/908/<br>633                   | 299/722/5<br>39                   | 160/403/2<br>61                   |                                  |
| rs7305871<br>3  | <i>CDH18</i>               | A                   | 24/332/98<br>8        | 59/614/20<br>59   | 38/438/1<br>432                   | 26/356/11<br>78                   | 21/176/62<br>7                    |                                  |
| rs780668        | <i>SLC29A3</i>             | A                   | 339/655/3<br>50       | 522/1415/<br>795  | 380/982/<br>546                   | 316/805/4<br>39                   | 142/433/2<br>49                   |                                  |
| rs1081775<br>8  | <i>DECI</i>                | T                   | 252/682/4<br>10       | 563/1364/<br>805  | 400/956/<br>552                   | 325/792/4<br>43                   | 163/408/2<br>53                   |                                  |
| rs1464662<br>42 | <i>FLG</i>                 | A                   | 3/44/1297             | 3/96/2633         | 2/67/183<br>9                     | 2/56/1502                         | 1/29/794                          |                                  |
| rs9302752       | <i>NOD2</i>                | C                   | 103/524/7<br>17       | 154/1007/<br>1571 | 119/721/<br>1068                  | 102/575/8<br>83                   | 35/286/50<br>3                    |                                  |
| rs2058660       | <i>IL18RAP/IL18<br/>RI</i> | C                   | 225/670/4<br>49       | 523/1279/<br>930  | 361/887/<br>660                   | 287/726/5<br>47                   | 162/392/2<br>70                   |                                  |
| rs4720118       | <i>BBS9</i>                | T                   | 124/571/6<br>49       | 234/1132/<br>1366 | 154/802/<br>952                   | 124/647/7<br>89                   | 80/330/41<br>4                    |                                  |
| rs663743        | <i>CCDC88B</i>             | A                   | 70/482/79<br>2        | 140/870/1<br>722  | 94/621/1<br>193                   | 80/511/96<br>9                    | 46/249/52<br>9                    |                                  |
| rs7641878<br>9  | <i>IL23R</i>               | A                   | 5/112/122<br>7        | 6/206/252<br>0    | 4/154/17<br>50                    | 3/130/142<br>7                    | 2/52/770                          |                                  |

Abbreviations: SNP, single nucleotide polymorphism;

<sup>a</sup> aa/Aa/AA, the numbers of cases and controls with minor allele homozygote/heterozygote/major allele homozygote genotypes, respectively.

<sup>b</sup> All HHCs as control subjects.

<sup>c</sup> Heredity-related Contacts as control subjects.

<sup>d</sup> First - degree family members as control subjects.

<sup>e</sup> non-Heredity-related contacts as control subjects.

**Supplementary table 5: Analysis of association between SNPs and leprosy onset early cases**

| SNP         | Gene                  | Minor allele | aa/Aa/AA <sup>a</sup> | F_A               | F_U  | OR (95% CI) <sup>b</sup> | P <sup>b</sup>   | Risk allele | OR (95% CI) <sup>c</sup> | P <sup>c</sup>   |      |
|-------------|-----------------------|--------------|-----------------------|-------------------|------|--------------------------|------------------|-------------|--------------------------|------------------|------|
|             |                       |              | Cases (n=44)          | Controls (n=1300) |      |                          |                  |             |                          |                  |      |
| rs2275606   | <i>RAB32</i>          | A            | 6/19/19               | 115/526/659       | 0.35 | 0.29                     | 1.33 (0.85-2.07) | 0.21        | A                        | 1.27 (0.81-1.97) | 0.30 |
| rs142179458 | <i>HIF1A</i>          | A            | 1/8/35                | 3/114/1183        | 0.11 | 0.05                     | 2.65 (1.34-5.25) | 0.004       | A                        | 2.31 (1.16-4.62) | 0.02 |
| rs3764147   | <i>LACCI</i>          | G            | 5/22/17               | 220/643/437       | 0.36 | 0.42                     | 0.80 (0.51-1.24) | 0.32        | A                        | 1.26 (0.81-1.98) | 0.31 |
| rs55894533  | <i>CTSB</i>           | C            | 8/23/13               | 292/640/368       | 0.44 | 0.47                     | 0.89 (0.58-1.37) | 0.61        | A                        | 1.13 (0.74-1.74) | 0.56 |
| rs6478108   | <i>TNFSF15</i>        | T            | 7/25/12               | 231/584/485       | 0.44 | 0.40                     | 1.18 (0.77-1.81) | 0.44        | T                        | 1.16 (0.76-1.75) | 0.49 |
| rs73058713  | <i>CDH18</i>          | A            | 0/13/31               | 24/319/957        | 0.15 | 0.14                     | 1.06 (0.58-1.92) | 0.86        | A                        | 1.09 (0.59-2.00) | 0.79 |
| rs780668    | <i>SLC29A3</i>        | A            | 14/21/9               | 325/634/341       | 0.56 | 0.49                     | 1.29 (0.84-1.98) | 0.25        | A                        | 1.26 (0.83-1.92) | 0.28 |
| rs10817758  | <i>DECI</i>           | T            | 10/25/9               | 242/657/401       | 0.51 | 0.44                     | 1.34 (0.87-2.05) | 0.18        | T                        | 1.32 (0.85-2.04) | 0.22 |
| rs146466242 | <i>FLG</i>            | A            | 0/2/42                | 3/42/1255         | 0.02 | 0.02                     | 1.24 (0.30-5.17) | 0.77        | A                        | 1.27 (0.33-4.97) | 0.73 |
| rs9302752   | <i>NOD2</i>           | C            | 5/20/19               | 98/504/698        | 0.34 | 0.27                     | 1.40 (0.90-2.20) | 0.14        | C                        | 1.48 (0.95-2.33) | 0.09 |
| rs2058660   | <i>IL18RAP/IL18R1</i> | C            | 10/19/15              | 215/651/434       | 0.44 | 0.42                     | 1.12 (0.73-1.72) | 0.61        | C                        | 1.14 (0.74-1.77) | 0.55 |
| rs4720118   | <i>BBS9</i>           | T            | 4/16/24               | 120/555/625       | 0.27 | 0.31                     | 0.85 (0.53-1.37) | 0.51        | C                        | 1.16 (0.72-1.88) | 0.55 |
| rs663743    | <i>CCDC88B</i>        | A            | 4/13/27               | 66/469/765        | 0.24 | 0.23                     | 1.04 (0.63-1.72) | 0.87        | A                        | 1.00 (0.61-1.65) | 0.99 |
| rs76418789  | <i>IL23R</i>          | A            | 0/2/42                | 5/110/1185        | 0.02 | 0.05                     | 0.48 (0.12-1.98) | 0.30        | G                        | 2.01 (0.49-8.27) | 0.33 |

Abbreviations: SNP, single nucleotide polymorphism; F\_A, minor allele frequency in patients diagnosed at the age<14-year; F\_U, minor allele frequency in patients diagnosed at the age≥14-year; OR, odds ratio with respect to the minor allele; CI,

confidence interval.

<sup>a</sup> aa/Aa/AA, the numbers of cases and controls with minor allele homozygote/heterozygote/major allele homozygote genotypes, respectively

<sup>b</sup> Association tested with  $\chi^2$  test or Fisher test.

<sup>c</sup> Association tested with logistic regression model adjusted for sex and ethnicity.

**Supplementary table 6: Analysis of association between SNPs and leprosy WHO classifications**

| SNP         | Gene                  | Minor allele | aa/Aa/AA <sup>a</sup> | F_A               | F_U  | OR (95% CI) <sup>b</sup> | P <sup>b</sup>    | Risk allele | OR (95% CI) <sup>c</sup> | P <sup>c</sup>   |      |
|-------------|-----------------------|--------------|-----------------------|-------------------|------|--------------------------|-------------------|-------------|--------------------------|------------------|------|
|             |                       |              | Cases (n=173)         | Controls (n=1171) |      |                          |                   |             |                          |                  |      |
| rs2275606   | <i>RAB32</i>          | A            | 12/73/88              | 109/472/590       | 0.28 | 0.29                     | 0.93 (0.73-1.199) | 0.59        | G                        | 1.07 (0.83-1.37) | 0.62 |
| rs142179458 | <i>HIF1A</i>          | A            | 0/18/155              | 4/104/1063        | 0.05 | 0.05                     | 1.09 (0.66-1.82)  | 0.73        | A                        | 1.13 (0.68-1.88) | 0.64 |
| rs3764147   | <i>LACCI</i>          | G            | 32/78/63              | 193/587/391       | 0.41 | 0.42                     | 0.98 (0.78-1.23)  | 0.86        | A                        | 1.02 (0.81-1.28) | 0.89 |
| rs55894533  | <i>CTSB</i>           | C            | 39/86/48              | 261/577/333       | 0.47 | 0.47                     | 1.02 (0.81-1.28)  | 0.87        | C                        | 1.02 (0.81-1.28) | 0.88 |
| rs6478108   | <i>TNFSF15</i>        | T            | 27/90/56              | 211/519/441       | 0.42 | 0.40                     | 1.06 (0.84-1.34)  | 0.61        | T                        | 1.03 (0.83-1.29) | 0.77 |
| rs73058713  | <i>CDH18</i>          | A            | 2/48/123              | 22/284/865        | 0.15 | 0.14                     | 1.09 (0.79-1.49)  | 0.61        | A                        | 1.10 (0.79-1.52) | 0.57 |
| rs780668    | <i>SLC29A3</i>        | A            | 41/88/44              | 298/567/306       | 0.49 | 0.50                     | 0.98 (0.78-1.23)  | 0.86        | A                        | 1.01 (0.81-1.26) | 0.93 |
| rs10817758  | <i>DECI</i>           | T            | 38/85/50              | 214/597/360       | 0.47 | 0.44                     | 1.12 (0.89-1.40)  | 0.33        | T                        | 1.14 (0.90-1.44) | 0.27 |
| rs146466242 | <i>FLG</i>            | A            | 0/6/167               | 3/38/1130         | 0.02 | 0.02                     | 0.92 (0.39-2.18)  | 0.85        | A                        | 1.06 (0.46-2.43) | 0.89 |
| rs9302752   | <i>NOD2</i>           | C            | 8/71/94               | 95/453/623        | 0.25 | 0.27                     | 0.89 (0.68-1.15)  | 0.37        | T                        | 1.08 (0.83-1.40) | 0.57 |
| rs2058660   | <i>IL18RAP/IL18R1</i> | C            | 36/82/55              | 189/588/394       | 0.45 | 0.41                     | 1.14 (0.91-1.43)  | 0.25        | C                        | 1.15 (0.91-1.45) | 0.24 |
| rs4720118   | <i>BBS9</i>           | T            | 17/84/72              | 107/487/577       | 0.34 | 0.30                     | 1.21 (0.95-1.54)  | 0.12        | T                        | 1.21 (0.95-1.54) | 0.13 |
| rs663743    | <i>CCDC88B</i>        | A            | 9/70/94               | 61/412/698        | 0.25 | 0.23                     | 1.16 (0.90-1.50)  | 0.28        | A                        | 1.15 (0.88-1.50) | 0.29 |
| rs76418789  | <i>IL23R</i>          | A            | 0/10/163              | 5/102/1064        | 0.03 | 0.05                     | 0.59 (0.31-1.14)  | 0.11        | G                        | 1.62 (0.84-3.11) | 0.15 |

Abbreviations: SNP, single nucleotide polymorphism; F\_A, minor allele frequency in paucibacillary leprosy cases; F\_U, minor allele frequency in multibacillary leprosy cases; OR, odds ratio with respect to the minor allele; CI, confidence interval.

<sup>a</sup> aa/Aa/AA, the numbers of cases and controls with minor allele

homozygote/heterozygote/major allele homozygote genotypes, respectively.

<sup>b</sup> Association tested with  $\chi^2$  test or Fisher test.

<sup>c</sup> Association tested with logistic regression model adjusted for sex, ethnicity and age at diagnosis.

## Supplementary table 7: Analysis of association between SNPs and leprosy

### subtypes

| SNP             | Gene                  | Minor allele | aa/Aa/AA <sup>a</sup> |                  | F_A  | F_U  | OR (95% CI) <sup>b</sup> | P <sup>b</sup> | Risk allele | OR (95% CI) <sup>c</sup> | P <sup>c</sup> |
|-----------------|-----------------------|--------------|-----------------------|------------------|------|------|--------------------------|----------------|-------------|--------------------------|----------------|
|                 |                       |              | Cases (n=391)         | Controls (n=841) |      |      |                          |                |             |                          |                |
| rs7641878<br>9  | <i>IL23R</i>          | A            | 0/28/363              | 5/75/761         | 0.04 | 0.05 | 0.70(0.45-1.08)          | 0.10           | G           | 1.37(0.89-2.11)          | 0.15           |
| rs1464662<br>42 | <i>FLG</i>            | A            | 1/11/379              | 2/26/813         | 0.02 | 0.02 | 0.93(0.48-1.80)          | 0.83           | A           | 1.06(0.57-1.98)          | 0.86           |
| rs2058660       | <i>IL18RAP/IL18RI</i> | C            | 79/184/128            | 132/426/28<br>3  | 0.44 | 0.41 | 1.12(0.94-1.33)          | 0.20           | C           | 1.13(0.94-1.34)          | 0.19           |
| rs7305871<br>3  | <i>CDH18</i>          | A            | 7/94/290              | 13/206/622       | 0.14 | 0.14 | 1.00(0.78-1.28)          | 0.99           | A           | 1.01(0.78-1.29)          | 0.97           |
| rs2275606       | <i>RAB32</i>          | A            | 25/166/200            | 82/333/426       | 0.28 | 0.30 | 0.91 (0.75-1.10)         | 0.33           | G           | 1.09 (0.90-1.31)         | 0.39           |
| rs4720118       | <i>BBS9</i>           | T            | 36/175/180            | 77/342/422       | 0.32 | 0.29 | 1.10(0.92-1.33)          | 0.29           | T           | 1.10(0.92-1.32)          | 0.31           |
| rs5589453<br>3  | <i>CTSB</i>           | C            | 77/216/98             | 199/395/24<br>7  | 0.47 | 0.47 | 1.01(0.85-1.19)          | 0.94           | C           | 1.01(0.85-1.20)          | 0.91           |
| rs6478108       | <i>TNFSF15</i>        | T            | 71/187/133            | 151/361/32<br>9  | 0.42 | 0.39 | 1.12(0.94-1.33)          | 0.21           | T           | 1.09(0.92-1.29)          | 0.32           |
| rs1081775<br>8  | <i>I-Dec</i>          | T            | 79/182/130            | 163/436/24<br>2  | 0.43 | 0.45 | 0.93(0.78-1.10)          | 0.40           | C           | 1.07(0.90-1.27)          | 0.46           |
| rs780668        | <i>SLC29A3</i>        | A            | 91/192/108            | 222/400/21<br>9  | 0.48 | 0.50 | 0.91(0.77-1.08)          | 0.28           | G           | 1.07(0.91-1.27)          | 0.42           |
| rs663743        | <i>CCDC88B</i>        | A            | 19/144/228            | 43/300/498       | 0.23 | 0.23 | 1.02(0.83-1.25)          | 0.86           | A           | 1.01(0.82-1.24)          | 0.92           |

|                 |              |   |            |                 |      |      |                     |         |   |                     |         |
|-----------------|--------------|---|------------|-----------------|------|------|---------------------|---------|---|---------------------|---------|
| rs3764147       | <i>LACCI</i> | G | 51/174/166 | 161/435/24<br>5 | 0.35 | 0.45 | 0.67(0.56-<br>0.79) | <0.0001 | A | 1.51(1.26-<br>1.81) | <0.0001 |
| rs1421794<br>58 | <i>HIF1A</i> | A | 3/40/348   | 1/71/769        | 0.06 | 0.04 | 1.38(0.94-<br>2.01) | 0.10    | A | 1.46(0.99-<br>2.14) | 0.05    |
| rs9302752       | <i>NOD2</i>  | C | 21/151/219 | 75/330/436      | 0.25 | 0.29 | 0.82(0.68-<br>1.00) | <0.05   | T | 1.18(0.97-<br>1.44) | 0.09    |

Abbreviations: SNP, single nucleotide polymorphism; F\_A, minor allele frequency in tuberculoid cases (BT/TT); F\_U, minor allele frequency in lepromatous cases (LL/BL); OR, odds ratio with respect to the minor allele; CI, confidence interval.

<sup>a</sup> aa/Aa/AA, the numbers of cases and controls with minor allele homozygote/heterozygote/major allele homozygote genotypes, respectively.

<sup>b</sup> Association tested with  $\chi^2$  test or Fisher test.

<sup>c</sup> Association tested with logistic regression model adjusted for sex, ethnicity and age at diagnosis.

**Supplementary table 8: Analysis of association between SNPs and reversal**

**reaction in BB, BT and BL leprosy cases**

| SNP         | Gene                  | Minor allele | aa/Aa/AA <sup>a</sup> |                  | F_A   | F_U  | OR (95% CI) <sup>b</sup> | P <sup>b</sup> | Risk allele | OR (95% CI) <sup>c</sup> | P <sup>c</sup> |
|-------------|-----------------------|--------------|-----------------------|------------------|-------|------|--------------------------|----------------|-------------|--------------------------|----------------|
|             |                       |              | Cases (n=54)          | Controls (n=696) |       |      |                          |                |             |                          |                |
| rs76418789  | <i>IL23R</i>          | A            | 1/3/50                | 2/62/632         | 0.05  | 0.05 | 0.98 (0.38-2.47)         | 0.96           | G           | 1.02 (0.40-2.56)         | 0.97           |
| rs146466242 | <i>FLG</i>            | A            | 0/1/53                | 2/24/670         | 0.009 | 0.02 | 0.46 (0.06-3.38)         | 0.43           | T           | 1.95 (0.28-13.67)        | 0.50           |
| rs2058660   | <i>IL18RAP/IL18R1</i> | C            | 8/30/16               | 114/344/238      | 0.43  | 0.41 | 1.06 (0.72-1.58)         | 0.76           | C           | 1.07 (0.71-1.60)         | 0.75           |
| rs73058713  | <i>CDH18</i>          | A            | 3/17/34               | 13/167/516       | 0.21  | 0.14 | 1.68 (1.04-2.73)         | 0.03           | A           | 1.69 (1.04-2.76)         | 0.03           |
| rs2275606   | <i>RAB32</i>          | A            | 5/21/28               | 69/275/352       | 0.29  | 0.30 | 0.95 (0.62-1.47)         | 0.83           | G           | 1.06 (0.69-1.62)         | 0.78           |
| rs4720118   | <i>BBS9</i>           | T            | 6/20/28               | 61/297/338       | 0.30  | 0.30 | 0.98 (0.64-1.50)         | 0.92           | C           | 1.03 (0.67-1.58)         | 0.91           |
| rs55894533  | <i>CTSB</i>           | C            | 7/28/19               | 159/347/190      | 0.39  | 0.48 | 0.70 (0.47-1.04)         | 0.07           | A           | 1.46 (0.97-2.18)         | 0.07           |
| rs6478108   | <i>TNFSF15</i>        | T            | 13/22/19              | 117/314/265      | 0.44  | 0.39 | 1.23 (0.83-1.83)         | 0.30           | T           | 1.21 (0.83-1.77)         | 0.33           |
| rs10817758  | <i>I-Dec</i>          | T            | 7/31/16               | 135/335/226      | 0.42  | 0.43 | 0.93 (0.62-1.38)         | 0.72           | C           | 1.09 (0.73-1.62)         | 0.69           |
| rs780668    | <i>SLC29A3</i>        | A            | 13/29/12              | 176/331/189      | 0.51  | 0.49 | 1.08 (0.73-1.59)         | 0.71           | A           | 1.07 (0.73-1.58)         | 0.72           |
| rs663743    | <i>CCDC88B</i>        | A            | 3/17/34               | 39/248/409       | 0.21  | 0.23 | 0.88 (0.55-1.43)         | 0.61           | G           | 1.13 (0.70-1.82)         | 0.61           |
| rs3764147   | <i>LACCI</i>          | G            | 6/18/30               | 112/347/237      | 0.28  | 0.41 | 0.55                     | 0.007          | A           | 1.85                     | 0.007          |

|             |              |   |         |            |      |      |             |      |   |             |      |
|-------------|--------------|---|---------|------------|------|------|-------------|------|---|-------------|------|
| rs142179458 | <i>HIF1A</i> | A | 0/7/47  | 3/71/622   | 0.06 | 0.06 | (0.36-0.85) | 0.68 | A | (1.19-2.87) | 0.73 |
|             |              |   |         |            |      |      | 1.18        |      |   | 1.15        |      |
|             |              |   |         |            |      |      | (0.53-2.63) |      |   | (0.52-2.55) |      |
| rs9302752   | <i>NOD2</i>  | C | 5/17/32 | 46/257/393 | 0.25 | 0.25 | 1.00        | 0.99 | C | 1.04        | 0.87 |
|             |              |   |         |            |      |      | (0.63-1.57) |      |   | (0.66-1.63) |      |

Abbreviations: SNP, single nucleotide polymorphism; F\_A, minor allele frequency in reversal reaction in BB, BT and BL leprosy cases; F\_U, minor allele frequency in BB, BT and BL leprosy cases free of reversal reaction; OR, odds ratio with respect to the minor allele; CI, confidence interval.

<sup>a</sup> aa/Aa/AA, the numbers of cases and controls with minor allele homozygote/heterozygote/major allele homozygote genotypes, respectively.

<sup>b</sup> Association tested with  $\chi^2$  test or Fisher test.

<sup>c</sup> Association tested with logistic regression model adjusted for sex, ethnicity and age at diagnosis.

**Supplementary table 9: Analysis of association between SNPs and erythema**

**nodosum leprosum in LL and BL leprosy cases**

| SNP         | Gene                  | Minor allele | aa/Aa/AA <sup>a</sup> |                  | F_A  | F_U  | OR (95% CI) <sup>b</sup> | P <sup>b</sup> | Risk allele | OR (95% CI) <sup>c</sup> | P <sup>c</sup> |
|-------------|-----------------------|--------------|-----------------------|------------------|------|------|--------------------------|----------------|-------------|--------------------------|----------------|
|             |                       |              | Cases (n=75)          | Controls (n=713) |      |      |                          |                |             |                          |                |
| rs76418789  | <i>IL23R</i>          | A            | 0/9/66                | 4/62/647         | 0.06 | 0.05 | 1.20 (0.60-2.53)         | 0.56           | A           | 1.23 (0.61-2.47)         | 0.57           |
| rs146466242 | <i>FLG</i>            | A            | 0/4/71                | 2/21/690         | 0.03 | 0.02 | 1.54 (0.53-4.47)         | 0.43           | A           | 1.49 (0.54-4.11)         | 0.44           |
| rs2058660   | <i>IL18RAP/IL18R1</i> | C            | 17/35/23              | 104/366/243      | 0.46 | 0.40 | 1.26 (0.90-1.77)         | 0.17           | C           | 1.26 (0.89-1.79)         | 0.19           |
| rs73058713  | <i>CDH18</i>          | A            | 0/22/53               | 12/171/530       | 0.15 | 0.14 | 1.09 (0.67-1.75)         | 0.74           | A           | 1.08 (0.66-1.77)         | 0.75           |
| rs2275606   | <i>RAB32</i>          | A            | 6/28/41               | 73/282/358       | 0.27 | 0.30 | 0.85 (0.58-1.24)         | 0.39           | G           | 1.16 (0.80-1.68)         | 0.44           |
| rs4720118   | <i>BBS9</i>           | T            | 7/30/38               | 63/295/355       | 0.29 | 0.30 | 0.99 (0.68-1.43)         | 0.96           | C           | 1.02 (0.71-1.48)         | 0.91           |
| rs55894533  | <i>CTSB</i>           | C            | 16/33/26              | 167/342/204      | 0.43 | 0.47 | 0.85 (0.60-1.19)         | 0.34           | A           | 1.18 (0.84-1.65)         | 0.33           |
| rs6478108   | <i>TNFSF15</i>        | T            | 19/31/25              | 122/302/289      | 0.46 | 0.38 | 1.37 (0.98-1.93)         | 0.07           | T           | 1.31 (0.95-1.81)         | 0.10           |
| rs10817758  | <i>I-Dec</i>          | T            | 13/44/18              | 143/359/211      | 0.47 | 0.45 | 1.06 (0.76-1.49)         | 0.74           | T           | 1.09 (0.77-1.54)         | 0.64           |
| rs780668    | <i>SLC29A3</i>        | G            | 15/38/22              | 190/338/185      | 0.45 | 0.50 | 0.82 (0.58-1.15)         | 0.24           | A           | 1.23 (0.88-1.72)         | 0.23           |
| rs663743    | <i>CCDC88B</i>        | A            | 5/24/46               | 36/258/419       | 0.23 | 0.23 | 0.97 (0.65-1.45)         | 0.90           | G           | 1.01 (0.67-1.52)         | 0.96           |
| rs3764147   | <i>LACCI</i>          | G            | 21/38/16              | 134/369/210      | 0.53 | 0.45 | 1.42                     | 0.04           | G           | 1.44                     | 0.04           |

|             |              |   |         |            |      |      |             |      |   |             |      |
|-------------|--------------|---|---------|------------|------|------|-------------|------|---|-------------|------|
| rs142179458 | <i>HIF1A</i> | A | 1/5/69  | 0/59/654   | 0.05 | 0.04 | (1.01-1.98) | 0.76 | A | (1.02-2.04) | 0.67 |
|             |              |   |         |            |      |      | 1.13        |      |   | 1.20        |      |
|             |              |   |         |            |      |      | (0.51-2.53) |      |   | (0.53-2.71) |      |
| rs9302752   | <i>NOD2</i>  | C | 6/33/36 | 62/280/371 | 0.30 | 0.28 | 1.08        | 0.67 | C | 1.10        | 0.60 |
|             |              |   |         |            |      |      | (0.75-1.57) |      |   | (0.76-1.59) |      |

Abbreviations: SNP, single nucleotide polymorphism; F\_A, minor allele frequency in erythema nodosum leprosum in LL and BL leprosy cases; F\_U, minor allele frequency in LL and BL leprosy cases free of erythema nodosum leprosum; OR, odds ratio with respect to the minor allele; CI, confidence interval.

<sup>a</sup> aa/Aa/AA, the numbers of cases and controls with minor allele homozygote/heterozygote/major allele homozygote genotypes, respectively.

<sup>b</sup> Association tested with  $\chi^2$  test or Fisher test.

<sup>c</sup> Association tested with logistic regression model adjusted for sex, ethnicity and age at diagnosis.

**Supplementary table 10: Analysis of association between SNPs and leprosy**

**reaction states**

| SNP             | Gene                          | Minor allele | aa/Aa/AA <sup>a</sup> |                 | F_A  | F_U   | OR (95% CI) <sup>b</sup> | P <sup>b</sup> | Risk allele | OR (95% CI) <sup>c</sup> | P <sup>c</sup> |
|-----------------|-------------------------------|--------------|-----------------------|-----------------|------|-------|--------------------------|----------------|-------------|--------------------------|----------------|
|                 |                               |              | Cases (n=79)          | Controls (n=67) |      |       |                          |                |             |                          |                |
| rs7641<br>8789  | <i>IL23R</i>                  | A            | 0/9/70                | 1/4/62          | 0.06 | 0.04  | 1.29<br>(0.45-<br>3.718) | 0.64           | A           | 1.26<br>(0.45-<br>3.52)  | 0.66           |
| rs1464<br>66242 | <i>FLG</i>                    | A            | 0/4/75                | 0/1/66          | 0.03 | 0.007 | 3.46<br>(0.38-<br>31.29) | 0.24           | A           | 3.18<br>(0.34-<br>29.58) | 0.31           |
| rs2058<br>660   | <i>IL18R</i><br><i>AP/IL1</i> | C            | 17/39/<br>23          | 11/36/20        | 0.46 | 0.43  | 1.13<br>(0.71-<br>1.79)  | 0.62           | C           | 1.12<br>(0.69-<br>1.80)  | 0.65           |
| rs7305<br>8713  | <i>CDHI</i><br>8              | A            | 0/23/5<br>6           | 3/22/42         | 0.15 | 0.21  | 0.65<br>(0.35-<br>1.18)  | 0.16           | C           | 1.69<br>(0.89-<br>3.23)  | 0.11           |
| rs2275<br>606   | <i>RAB32</i>                  | A            | 6/29/4<br>4           | 7/27/33         | 0.26 | 0.31  | 0.79<br>(0.48-<br>1.33)  | 0.38           | G           | 1.20<br>(0.70-<br>2.04)  | 0.51           |
| rs4720<br>118   | <i>BBS9</i>                   | T            | 8/33/3<br>8           | 7/26/34         | 0.31 | 0.30  | 1.06<br>(0.64-<br>1.74)  | 0.83           | T           | 1.07<br>(0.65-<br>1.75)  | 0.79           |
| rs5589<br>4533  | <i>CTSB</i>                   | C            | 17/35/<br>27          | 10/34/23        | 0.44 | 0.40  | 1.15<br>(0.72-<br>1.83)  | 0.56           | C           | 1.12<br>(0.70-<br>1.78)  | 0.64           |
| rs6478<br>108   | <i>TNFSF</i><br>15            | T            | 19/34/<br>26          | 15/32/20        | 0.46 | 0.46  | 0.97<br>(0.61-<br>1.54)  | 0.90           | C           | 1.02<br>(0.64-<br>1.62)  | 0.93           |
| rs1081<br>7758  | <i>I-Dec</i>                  | T            | 13/47/<br>19          | 8/39/20         | 0.46 | 0.41  | 1.23<br>(0.77-<br>1.96)  | 0.38           | T           | 1.31<br>(0.77-<br>2.21)  | 0.32           |
| rs7806<br>68    | <i>SLC29</i><br><i>A3</i>     | G            | 15/41/<br>23          | 15/33/19        | 0.45 | 0.47  | 0.92<br>(0.58-<br>1.46)  | 0.72           | A           | 1.12<br>(0.70-<br>1.80)  | 0.63           |
| rs6637<br>43    | <i>CCDC</i><br><i>88B</i>     | A            | 5/26/4<br>8           | 3/20/44         | 0.23 | 0.19  | 1.23<br>(0.70-<br>2.16)  | 0.48           | A           | 1.34<br>(0.74-<br>2.40)  | 0.33           |
| rs3764          | <i>LACCI</i>                  | G            | 23/39/<br>8           | 7/26/34         | 0.54 | 0.30  | 2.74                     | <0.00          | G           | 2.75                     | <              |

|                 |              |   |             |         |      |      |                         |      |   |                         |        |
|-----------------|--------------|---|-------------|---------|------|------|-------------------------|------|---|-------------------------|--------|
| 147             |              |   | 17          |         |      |      | (1.69-<br>4.44)         | 01   |   | (1.65-<br>4.59)         | 0.0001 |
| rs1421<br>79458 | <i>HIF1A</i> | A | 1/6/72      | 0/8/59  | 0.05 | 0.06 | 0.84<br>(0.31-<br>2.30) | 0.73 | G | 1.15<br>(0.43-<br>3.05) | 0.78   |
| rs9302<br>752   | <i>NOD2</i>  | C | 7/36/3<br>6 | 6/24/37 | 0.32 | 0.27 | 1.26<br>(0.76-<br>2.10) | 0.37 | C | 1.32<br>(0.77-<br>2.25) | 0.31   |

Abbreviations: SNP, single nucleotide polymorphism; F\_A, minor allele frequency in erythema nodosum leprosum cases; F\_U, minor allele frequency in reversal reaction cases; OR, odds ratio with respect to the minor allele; CI, confidence interval.

<sup>a</sup> aa/Aa/AA, the numbers of cases and controls with minor allele

homozygote/heterozygote/major allele homozygote genotypes, respectively.

<sup>b</sup> Association tested with  $\chi^2$  test or Fisher test.

<sup>c</sup> Association tested with logistic regression model adjusted for sex, ethnicity and age at diagnosis.
